# Supplementary material for: Evaluating the Rhizosphere and Endophytic Microbiomes of a Bamboo Plant in Response to the Long-Term Application of Heavy Organic Amendment
Source: MDPI journal article supplement (doi:10.3390/plants11162129), 2022-08-16
Supplement: s1 [file s1]

Table S1. Comparative analysis for the relative abundance of dominant bacterial genera in rhizosphere soils and roots of Lei bamboo.

| Phylum         | Genus                                             | Soil            |                | Root           |                  |
|----------------|---------------------------------------------------|-----------------|----------------|----------------|------------------|
|                |                                                   | IMS             | TMS            | IMS            | TMS              |
| Acidobacteria  | <i>Acidipila</i>                                  | 4.02% ± 0.52%a  | 1.29% ± 0.13%b | 5.37% ± 3.01%a | 0.08% ± 0.03%b   |
| Acidobacteria  | <i>Subgroup_13</i>                                | 5.78% ± 0.68%a  | 2.48% ± 0.31%b | 0.27% ± 0.12%a | 0.06% ± 0.06%b   |
| Acidobacteria  | <i>Occallatibacter</i>                            | 2.32% ± 0.31%b  | 5.66% ± 0.50%a | 0.16% ± 0.05%a | 0.16% ± 0.07%a   |
| Acidobacteria  | <i>Subgroup_2</i>                                 | 2.05% ± 0.22%b  | 5.45% ± 0.94%a | 0.10% ± 0.07%a | 0.14% ± 0.11%a   |
| Acidobacteria  | <i>Granulicella</i>                               | 0.91% ± 0.19%a  | 0.83% ± 0.10%a | 2.73% ± 1.47%a | 0.69% ± 0.49%b   |
| Actinobacteria | <i>Streptomyces</i>                               | 0.11% ± 0.17%b  | 0.95% ± 0.53%a | 1.19% ± 0.61%a | 18.12% ± 13.86%a |
| Actinobacteria | <i>Mycobacterium</i>                              | 0.54% ± 0.08%b  | 1.09% ± 0.38%a | 2.51% ± 1.00%b | 15.17% ± 4.37%a  |
| Actinobacteria | <i>Acidotherrmus</i>                              | 4.07% ± 0.34%a  | 2.68% ± 0.17%b | 5.70% ± 1.98%a | 0.82% ± 0.23%b   |
| Actinobacteria | <i>Actinospica</i>                                | 0.38% ± 0.09%b  | 0.55% ± 0.09%a | 3.07% ± 1.43%a | 0.16% ± 0.11%b   |
| Firmicutes     | <i>Bacillus</i>                                   | 0.33% ± 0.15%b  | 0.58% ± 0.17%a | 0.86% ± 0.61%b | 3.90% ± 1.21%a   |
| Proteobacteria | <i>Chujaibacter</i>                               | 13.47% ± 2.38%a | 1.85% ± 0.15%b | 2.03% ± 0.78%a | 0.07% ± 0.02%b   |
| Proteobacteria | <i>Burkholderia-Caballeronia-Paraburkholderia</i> | 1.00% ± 0.21%b  | 2.29% ± 0.50%a | 2.45% ± 1.47%b | 11.66% ± 4.72%a  |
| Proteobacteria | <i>Acidibacter</i>                                | 6.89% ± 0.46%a  | 3.68% ± 0.32%b | 2.89% ± 0.94%a | 1.21% ± 0.68%b   |
| Proteobacteria | <i>Acidocella</i>                                 | 0.15% ± 0.06%a  | 0.01% ± 0.01%b | 6.31% ± 1.95%a | 0.09% ± 0.04%b   |
| Proteobacteria | <i>Acidisoma</i>                                  | 0.23% ± 0.08%a  | 0.11% ± 0.03%b | 5.97% ± 0.97%a | 0.10% ± 0.04%b   |
| Proteobacteria | <i>Bradyrhizobium</i>                             | 1.05% ± 0.11%b  | 2.42% ± 0.32%a | 0.59% ± 0.19%b | 1.72% ± 0.49%a   |
| Proteobacteria | <i>KF-JG30-C25</i>                                | 1.79% ± 0.09%a  | 1.95% ± 0.16%a | 0.15% ± 0.09%a | 0.10% ± 0.09%a   |

Different lowercase letters within rows indicate significant difference ( $p < 0.05$ ).

IMS, intensive management system; TMS, traditional management system.

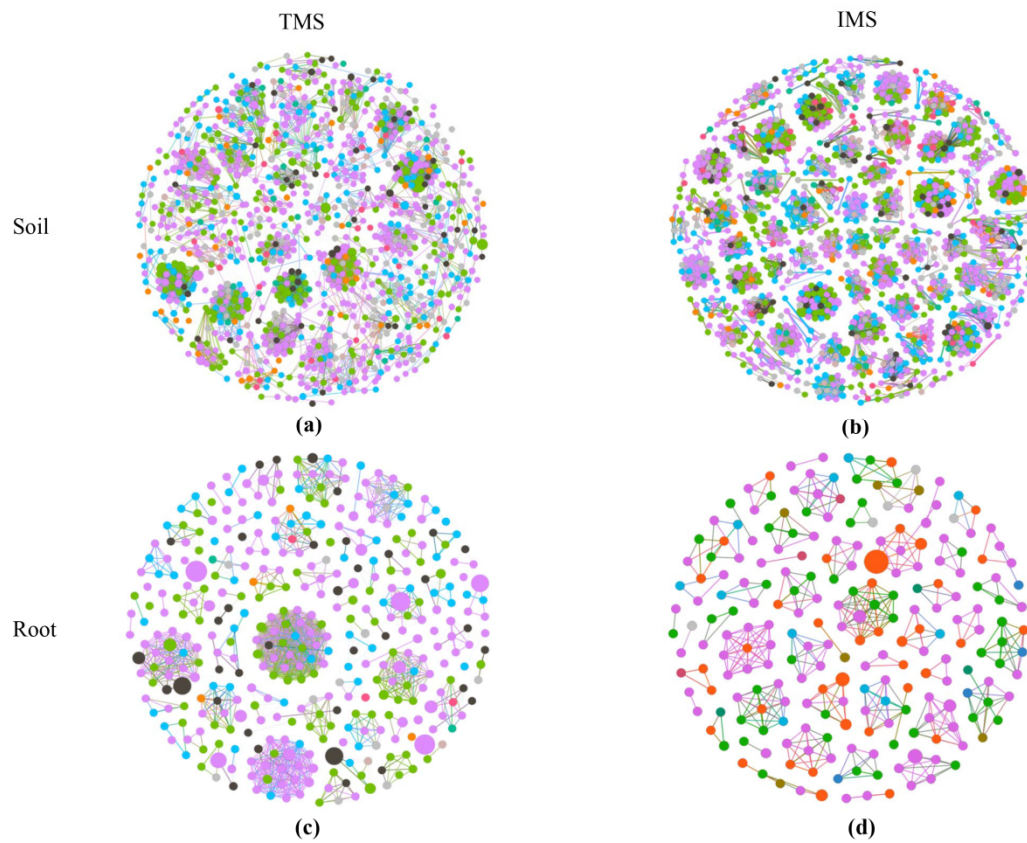

**Figure S1.** Bacterial networks in bamboo rhizosphere soil (a, b) and root (c, d) collected from intensive management system (IMS) and traditional management system (TMS).
